# Supplementary material for: Case report: Chronic Candida albicans meningitis: a rare entity diagnosed by metagenomic next-generation sequencing
Source: PubMed Central journal article supplement (PMC11066203; doi:10.3389/fcimb.2024.1322847), 2024-04-19
Supplement: Presentation_1.pdf [file Presentation_1.pdf]

## Supplement

### mNGS pipeline

**DNA extraction.** DNA extraction was carried out on 200  $\mu$ L cerebrospinal fluid (CSF) samples for the first two and 600  $\mu$ L for the third time point samplings. Prior to the extraction process, the samples were filtered through a 100- $\mu$ m cell strainer (Corning, Corning, NY, USA), which was subsequently washed twice with 200  $\mu$ L SU buffer from the Ultra-Deep Microbiome Prep kit (Molzym, Bremen, Germany). The DNA extraction protocol followed the manufacturer's instructions for liquid samples using the Ultra-Deep Microbiome Prep kit. A negative extraction control was performed by substituting the clinical sample with the SU buffer.

**DNA sequencing.** Metagenomic libraries were prepared from 30  $\mu$ L of DNA extracts using Nextera DNA Flex Library Prep (Illumina, San Diego, USA) with 12 amplification cycles. The libraries were sequenced (2 $\times$ 151) on an Illumina iSeq 100 System instrument.

**Bioinformatics analysis.** We used Trimmomatic v.0.36 package [1] for the following: (i) the removal of bases corresponding to standard Illumina adapters; (ii) trimming bases from the start or end of a read, if below a quality threshold of 5; and (iii) the trimming of low-quality ends within any 20-base sliding window with an average Phred quality <30. Reads with a length <90 bases after the trimming step were excluded. Additionally, potential artificial replicate reads were filtered out using a custom script, available at <https://github.com/GRL-HUG/duplicates>.

Reads matching the human genomic sequence were identified using CLARK [2] v.1.2.5 with default parameters and the GRCh38.p7 database [3,4]. After removal of human-associated reads, the data were deposited to European Nucleotide Archive (ENA) database (study number PRJEB39758). The remaining reads were classified at the species level using CLARK (with parameters -m 0 -c 0.8) against the database of representative/reference microbial (bacterial, archaeal, fungal and viral) genomes [4]

1. Bolger AM, Lohse M, Usadel B (2014) Trimmomatic: a flexible trimmer for Illumina sequence data. *Bioinformatics* 30: 2114-2120.
2. Ounit R, Wanamaker S, Close TJ, Lonardi S (2015) CLARK: fast and accurate classification of metagenomic and genomic sequences using discriminative k-mers. *BMC Genomics* 16: 236.
3. International Human Genome Sequencing Consortium (2001) Initial sequencing and analysis of the human genome. *Nature* 409: 860.
4. Pruitt KD, Tatusova T, Maglott DR (2007) NCBI reference sequences (RefSeq): a curated non-redundant sequence database of genomes, transcripts and proteins. *Nucleic Acid Research* 35: D61-D65.
